# Supplementary material for: Short timescale wetting and penetration on porous sheets measured with ultrasound, direct absorption and contact angle
Source: Royal Society of Chemistry journal article supplement (doi:10.1039/c8ra01434e), 2018-01-01
Supplement: c8ra01434e1.pdf [file c8ra01434e1.pdf]

- ▼AKD - Water
- ▼AKD - 80%Water/20%Glycerin
- ▼AKD - 80%Water/20%Glycol
- ◀AKD - 50%Water/40%Glycerin/10%HD
- ▶AKD - 60%Water/30%Glycerin/4%Hexanediol/6%Diacetonolcohol
- AKD - dye ink yellow
- ★AKD - dye ink magenta
- ✖AKD - pigment ink yellow
- +AKD - pigment ink magenta
- ◆AKD - latex pigment ink yellow
- AKD - latex pigment ink magenta
- ▼Unsize - Water
- ▼Unsize - 80%Water/20%Glycerin
- ▼Unsize - 80%Water/20%Glycol
- ◀Unsize - 50%Water/40%Glycerin/10%Hexanediol
- ▶Unsize - 60%Water/30%Glycerin/4%Hexanediol/6%Diacetonolcohol
- Unsize - dye ink yellow
- ★Unsize - dye ink magenta
- ✖Unsize - pigment ink yellow
- +Unsize - pigment ink magenta
- ◆Unsize - latex pigment ink yellow
- Unsize - latex pigment ink magenta
- ▼Pigmented - Water
- ▼Pigmented - 80%Water/20%Glycerin
- ▼Pigmented - 80%Water/20%Glycol
- ◀Pigmented - 50%Water/40%Glycerin/10%Hexanediol
- ▶Pigmented - 60%Water/30%Glycerin/4%Hexanediol/6%Diacetonolcohol
- Pigmented - dye ink yellow
- ★Pigmented - dye ink magenta
- ✖Pigmented - pigment ink yellow
- +Pigmented - pigment ink magenta
- ◆Pigmented - latex pigment ink yellow
- Pigmented - latex pigment ink magenta
- ◀Unsize & Untreated - 50%Water/40%Glycerin/10%Hexandiol
- ▶Unsize & Untreated - 60%Water/30%Glycerin/4%Hexanediol/6%Diacetonolcohol
- Unsize & Untreated - dye ink yellow
- ★Unsize & Untreated - dye ink magenta
- ✖Unsize & Untreated - pigment ink yellow
- +Unsize & Untreated - pigment ink magenta
- ◆Unsize & Untreated - latex pigment ink yellow
- Unsize & Untreated - latex pigment ink magenta
